# Supplementary material for: Long term cause specific mortality among 34 489 five year survivors of childhood cancer in Great Britain: population based cohort study
Source: PubMed Central journal article supplement (PMC5008696; doi:10.1136/bmj.i4351), 2016-09-01
Supplement: fidm032064.ww1_default.pdf [file fidm032064.ww1_default.pdf]

| Characteristic                     | Treatment Period |      |           |      |           |      |           |      |
|------------------------------------|------------------|------|-----------|------|-----------|------|-----------|------|
|                                    | 1940-1969        | %    | 1970-1979 | %    | 1980-1989 | %    | 1990-2006 | %    |
| <b>Overall</b>                     | 3746             | 10.9 | 5379      | 15.6 | 7147      | 20.7 | 18217     | 52.8 |
| <b>Sex</b>                         |                  |      |           |      |           |      |           |      |
| Male                               | 2019             | 53.9 | 2963      | 55.1 | 3941      | 55.1 | 10016     | 55.0 |
| Female                             | 1727             | 46.1 | 2416      | 44.9 | 3206      | 44.9 | 8201      | 45.0 |
| <b>First Primary Neoplasm Type</b> |                  |      |           |      |           |      |           |      |
| CNS (excluding PNET)               | 1059             | 28.3 | 1094      | 20.3 | 1185      | 16.6 | 3632      | 19.9 |
| CNS PNET                           | 167              | 4.5  | 174       | 3.2  | 236       | 3.3  | 621       | 3.4  |
| Leukemia (excluding AML)           | 168              | 4.5  | 1554      | 28.9 | 2206      | 30.9 | 5565      | 30.6 |
| AML                                | 10               | 0.3  | 68        | 1.3  | 193       | 2.7  | 710       | 3.9  |
| Hodgkin Lymphoma                   | 297              | 7.9  | 456       | 8.5  | 495       | 6.9  | 986       | 5.4  |
| Non-Hodgkin Lymphoma               | 179              | 4.8  | 206       | 3.8  | 403       | 5.6  | 761       | 4.2  |
| Neuroblastoma                      | 217              | 5.8  | 153       | 2.8  | 307       | 4.3  | 858       | 4.7  |
| Non-Heritable Retinoblastoma       | 255              | 6.8  | 195       | 3.6  | 160       | 2.2  | 396       | 2.2  |
| Heritable Retinoblastoma           | 269              | 7.2  | 128       | 2.4  | 127       | 1.8  | 226       | 1.2  |
| Wilms                              | 324              | 8.7  | 480       | 8.9  | 515       | 7.2  | 1069      | 5.9  |
| Bone Sarcoma                       | 154              | 4.1  | 179       | 3.3  | 267       | 3.7  | 595       | 3.3  |
| Soft Tissue Sarcoma                | 310              | 8.3  | 302       | 5.6  | 453       | 6.3  | 1082      | 5.9  |
| Other                              | 337              | 9.0  | 390       | 7.3  | 600       | 8.4  | 1716      | 9.4  |
| <b>Age at Diagnosis</b>            |                  |      |           |      |           |      |           |      |
| 0-4                                | 1727             | 46.1 | 2326      | 43.2 | 3317      | 46.4 | 8327      | 45.7 |
| 5-9                                | 931              | 24.9 | 1567      | 29.1 | 1864      | 26.1 | 4902      | 26.9 |
| 10-14                              | 1088             | 29.0 | 1486      | 27.6 | 1966      | 27.5 | 4988      | 27.4 |
| <b>Follow-up (years)</b>           |                  |      |           |      |           |      |           |      |
| Mean (SD)                          | 41.3             | 16.9 | 33.3      | 11.0 | 26.7      | 6.6  | 14.7      | 5.0  |
| 5-9                                | 458              | 12.2 | 524       | 9.7  | 459       | 6.4  | 3981      | 21.9 |
| 10-19                              | 214              | 5.7  | 319       | 5.9  | 338       | 4.7  | 10750     | 59.0 |
| 20-29                              | 166              | 4.4  | 243       | 4.5  | 4005      | 56.0 | 3486      | 19.1 |
| 30-39                              | 202              | 5.4  | 2896      | 53.8 | 2345      | 32.8 | 0         | 0    |
| 40-49                              | 1409             | 37.6 | 1397      | 26.0 | 0         | 0    | 0         | 0    |
| 50-59                              | 1155             | 30.8 | 0         | 0    | 0         | 0    | 0         | 0    |
| 60+                                | 142              | 3.8  | 0         | 0    | 0         | 0    | 0         | 0    |
| <b>Attained Age (years)</b>        |                  |      |           |      |           |      |           |      |
| Mean (SD)                          | 47.8             | 16.9 | 40.0      | 11.5 | 33.3      | 7.9  | 21.3      | 6.5  |
| 5-9                                | 86               | 2.3  | 105       | 2.0  | 95        | 1.3  | 565       | 3.1  |
| 10-19                              | 405              | 10.8 | 478       | 8.9  | 429       | 6.0  | 7133      | 39.2 |
| 20-29                              | 219              | 5.9  | 314       | 5.8  | 1474      | 20.6 | 8726      | 47.9 |
| 30-39                              | 193              | 5.2  | 902       | 16.8 | 3730      | 52.2 | 1793      | 9.8  |
| 40-49                              | 605              | 16.2 | 2826      | 52.5 | 1419      | 19.9 | 0         | 0    |
| 50-59                              | 1343             | 35.9 | 754       | 14.0 | 0         | 0    | 0         | 0    |
| 60+                                | 895              | 23.9 | 0         | 0    | 0         | 0    | 0         | 0    |

**eTable 1:** Cohort characteristics of the British Childhood Cancer Survivor Study by treatment period  
Abbreviations: CNS – central nervous system, PNET – primitive neuroectodermal tumor, AML – acute myeloid leukemia

| First Primary Neoplasm Type  | Attained Age (years) |      |       |      |       |      |       |      |       |      |       |      |     |      |
|------------------------------|----------------------|------|-------|------|-------|------|-------|------|-------|------|-------|------|-----|------|
|                              | 5-9                  | %    | 10-19 | %    | 20-29 | %    | 30-39 | %    | 40-49 | %    | 50-59 | %    | 60+ | %    |
| CNS (excluding PNET)         | 159                  | 18.7 | 1553  | 18.4 | 2258  | 21.0 | 1196  | 18.1 | 977   | 20.1 | 559   | 26.7 | 268 | 29.9 |
| CNS PNET                     | 19                   | 2.2  | 371   | 4.4  | 381   | 3.6  | 193   | 2.9  | 148   | 3.1  | 62    | 3.0  | 24  | 2.3  |
| Leukemia (excluding AML)     | 285                  | 33.5 | 2987  | 35.4 | 3092  | 28.8 | 1892  | 28.6 | 1102  | 22.7 | 126   | 6.0  | 9   | 1.0  |
| AML                          | 36                   | 4.2  | 320   | 3.8  | 363   | 3.4  | 181   | 2.7  | 58    | 1.2  | 22    | 1.1  | 1   | 0.1  |
| Hodgkin Lymphoma             | 3                    | 0.4  | 248   | 2.9  | 705   | 6.6  | 471   | 7.1  | 497   | 10.3 | 228   | 10.9 | 82  | 9.2  |
| Non-Hodgkin Lymphoma         | 14                   | 1.7  | 217   | 2.6  | 457   | 4.3  | 417   | 6.3  | 255   | 5.3  | 123   | 5.9  | 66  | 7.4  |
| Neuroblastoma                | 100                  | 11.8 | 550   | 6.5  | 412   | 3.8  | 225   | 3.4  | 135   | 2.8  | 95    | 4.5  | 18  | 2.0  |
| Non-Heritable Retinoblastoma | 31                   | 3.6  | 214   | 2.5  | 230   | 2.1  | 154   | 2.3  | 201   | 4.1  | 122   | 5.8  | 54  | 6.0  |
| Heritable Retinoblastoma     | 51                   | 6.0  | 151   | 1.8  | 148   | 1.4  | 127   | 1.9  | 142   | 2.9  | 97    | 4.6  | 34  | 3.8  |
| Wilms                        | 48                   | 5.6  | 624   | 7.4  | 627   | 5.8  | 488   | 7.4  | 405   | 8.4  | 155   | 7.4  | 41  | 4.6  |
| Bone Sarcoma                 | 4                    | 0.5  | 182   | 2.2  | 365   | 3.4  | 270   | 4.1  | 203   | 4.2  | 100   | 4.8  | 71  | 7.9  |
| Soft Tissue Sarcoma          | 35                   | 4.1  | 454   | 5.4  | 676   | 6.3  | 409   | 6.2  | 306   | 6.3  | 173   | 8.3  | 94  | 10.5 |
| Other                        | 66                   | 7.8  | 574   | 6.8  | 1019  | 9.5  | 595   | 9.0  | 421   | 8.7  | 235   | 11.2 | 133 | 14.9 |

**eTable 2:** First primary neoplasm types of the British Childhood Cancer Survivor Study by attained age

Abbreviations: CNS – central nervous system, PNET – primitive neuroectodermal tumor, AML – acute myeloid leukemia, SD – standard deviation

|                                | Treatment Period | Person-Years | All Causes |                      |                        | Recurrence/Progression |                        | Subsequent Primary Neoplasms |                      |                      | Non-Neoplastic |                     |                       |
|--------------------------------|------------------|--------------|------------|----------------------|------------------------|------------------------|------------------------|------------------------------|----------------------|----------------------|----------------|---------------------|-----------------------|
|                                |                  |              | O/E        | SMR (95% CI)         | AER (95% CI)           | O/E                    | AER (95% CI)           | O/E                          | SMR (95% CI)         | AER (95% CI)         | O/E            | SMR (95% CI)        | AER (95% CI)          |
| CNS<br>(excluding<br>PNET)     | <1970            | 35,111       | 506/62.6   | 8.1<br>(7.4-8.8)     | 126.3<br>(113.7-138.8) | 275/0.0                | 78.3<br>(69.1-87.6)    | 53/22.6                      | 2.3<br>(1.8-3.1)     | 8.7<br>(4.6-12.7)    | 178/40.0       | 4.5<br>(3.8-5.2)    | 39.3<br>(31.9-46.8)   |
|                                | 1970-1979        | 30,505       | 335/27.2   | 12.3<br>(11.0-13.7)  | 100.9<br>(89.1-112.7)  | 193/0.0                | 63.3<br>(54.3-72.2)    | 41/6.2                       | 6.6<br>(4.7-8.9)     | 11.4<br>(7.3-15.5)   | 101/20.9       | 4.8<br>(3.9-5.9)    | 26.2<br>(19.8-32.7)   |
|                                | 1980-1989        | 24,887       | 252/15.0   | 16.8<br>(14.8-19.0)  | 95.2<br>(82.7-107.7)   | 165/0.0                | 66.3<br>(56.2-76.4)    | 27/2.4                       | 11.3<br>(7.5-16.5)   | 9.9<br>(5.8-14.0)    | 60/12.6        | 4.8<br>(3.6-6.1)    | 19.0<br>(12.9-25.1)   |
|                                | 1990-2006        | 34,248       | 241/10.8   | 22.3<br>(19.6-25.3)  | 67.2<br>(58.3-76.1)    | 175/0.0                | 51.1<br>(43.5-58.7)    | 27/1.5                       | 18.3<br>(12.0-26.6)  | 7.5<br>(4.5-10.4)    | 39/9.3         | 4.2<br>(3.0-5.7)    | 8.7<br>(5.1-12.2)     |
| P for trend                    |                  |              |            | 0.0397 <sup>b</sup>  | <0.0001 <sup>a</sup>   |                        | <0.0001 <sup>a</sup>   |                              | 0.0006 <sup>b</sup>  | 0.9094 <sup>a</sup>  |                | 0.9024 <sup>b</sup> | <0.0001 <sup>a</sup>  |
| CNS PNET                       | <1970            | 4,487        | 106/6.6    | 16.0<br>(13.1-19.3)  | 221.4<br>(176.5-266.4) | 61/0.0                 | 135.9 (101.8-170.1)    | 27/2.1                       | 13.2<br>(8.7-19.2)   | 55.6<br>(32.9-78.3)  | 18/4.6         | 3.9<br>(2.3-6.2)    | 29.9<br>(11.4-48.4)   |
|                                | 1970-1979        | 4,160        | 76/3.5     | 21.9<br>(17.2-27.4)  | 174.3<br>(133.3-215.4) | 39/0.0                 | 93.8 (64.3-123.2)      | 18/0.7                       | 26.5<br>(15.7-41.9)  | 41.6<br>(21.6-61.6)  | 19/2.8         | 6.8<br>(4.1-10.6)   | 39.0<br>(18.4-59.5)   |
|                                | 1980-1989        | 4,510        | 67/2.7     | 24.9<br>(19.3-31.7)  | 142.6<br>(107.0-178.2) | 50/0.0                 | 110.9 (80.1-141.6)     | 8/0.4                        | 21.4<br>(9.2-42.1)   | 16.9<br>(4.6-29.2)   | 9/2.3          | 3.9<br>(1.8-7.4)    | 14.8<br>(1.8-27.9)    |
|                                | 1990-2006        | 5,538        | 91/1.8     | 50.4<br>(40.6-61.9)  | 161.1<br>(127.3-194.8) | 65/0.0                 | 117.4 (88.8-145.9)     | 19/0.2                       | 80.9<br>(48.7-126.3) | 33.9<br>(18.5-49.3)  | 7/1.6          | 4.5<br>(1.8-9.2)    | 9.8<br>(0.4-19.2)     |
| P for trend                    |                  |              |            | 0.4198 <sup>b</sup>  | 0.0207 <sup>a</sup>    |                        | 0.6074 <sup>a</sup>    |                              | 0.2312 <sup>b</sup>  | 0.0710 <sup>a</sup>  |                | 0.7987 <sup>b</sup> | 0.0436 <sup>a</sup>   |
| Leukemia<br>(excluding<br>AML) | <1970            | 3,256        | 98/4.1     | 24.0<br>(19.5-29.3)  | 288.4<br>(228.8-348.0) | 94/0.0                 | 288.7<br>(230.3-347.0) | 1/1.3                        | 0.8<br>(0.0-4.4)     | -0.8<br>(-6.8-5.2)   | 3/2.8          | 1.1<br>(0.2-3.1)    | 0.6<br>(-9.9-11.0)    |
|                                | 1970-1979        | 40,452       | 414/29.2   | 14.2<br>(12.8-15.6)  | 95.1<br>(85.3-105.0)   | 309/0.0                | 76.4<br>(67.9-84.9)    | 50/5.9                       | 8.4<br>(6.3-11.1)    | 10.9<br>(7.5-14.3)   | 55/23.3        | 2.4<br>(1.8-3.1)    | 7.8<br>(4.2-11.4)     |
|                                | 1980-1989        | 47,088       | 289/23.1   | 12.5<br>(11.1-14.1)  | 56.5<br>(49.4-63.6)    | 207/0.0                | 44.0<br>(38.0-49.9)    | 32/3.4                       | 9.3<br>(6.4-13.1)    | 6.1<br>(3.7-8.4)     | 50/19.6        | 2.5<br>(1.9-3.4)    | 6.5<br>(3.5-9.4)      |
|                                | 1990-2006        | 54,441       | 303/14.8   | 20.4<br>(18.2-22.9)  | 52.9<br>(46.7-59.2)    | 220/0.0                | 40.4<br>(35.1-45.8)    | 43/2.1                       | 20.6<br>(14.9-27.7)  | 7.5<br>(5.2-9.9)     | 40/12.7        | 3.1<br>(2.2-4.3)    | 5.0<br>(2.7-7.3)      |
| P for trend                    |                  |              |            | <0.0001 <sup>b</sup> | <0.0001 <sup>a</sup>   |                        | <0.0001 <sup>a</sup>   |                              | 0.1542 <sup>b</sup>  | 0.3670 <sup>a</sup>  |                | 0.9337 <sup>b</sup> | 0.3789 <sup>a</sup>   |
| AML                            | <1970            | 409          | 2/0.6      | 3.3<br>(0.4-11.9)    | 34.1<br>(-33.8-101.9)  | 1/0.0                  | 24.5<br>(-23.5-72.5)   | 1/0.2                        | 5.7<br>(0.1-31.7)    | 20.2<br>(-27.8-68.2) | 0/0.4          | 0.0<br>(-8.6)       | -10.6<br>(-10.6-10.6) |
|                                | 1970-1979        | 1,878        | 14/1.6     | 8.5<br>(4.7-14.3)    | 65.8<br>(26.8-104.9)   | 7/0.0                  | 37.3<br>(9.7-64.9)     | 4/0.3                        | 11.7<br>(3.2-30.1)   | 19.5<br>(-1.4-40.4)  | 3/1.3          | 2.3<br>(0.5-6.7)    | 9.0<br>(-9.0-27.1)    |
|                                | 1980-1989        | 3,976        | 36/2.0     | 18.1<br>(12.7-25.1)  | 85.6<br>(56.0-115.1)   | 15/0.0                 | 37.7<br>(18.6-56.8)    | 7/0.3                        | 22.5<br>(9.0-46.3)   | 16.8<br>(3.8-29.9)   | 14/1.7         | 8.4<br>(4.6-14.0)   | 31.0<br>(12.6-49.4)   |
|                                | 1990-2006        | 6,768        | 30/2.0     | 15.2<br>(10.3-21.7)  | 41.4<br>(25.6-57.3)    | 21/0.0                 | 31.0<br>(17.8-44.3)    | 0/0.3                        | 0                    | -0.4<br>(-0.4-0.4)   | 9/1.7          | 5.3<br>(2.4-10.1)   | 10.8<br>(2.1-19.5)    |
| P trend                        |                  |              |            | 0.8310 <sup>b</sup>  | 0.1324 <sup>a</sup>    |                        | 0.7522 <sup>a</sup>    |                              | 0.3467 <sup>b</sup>  | 0.0071 <sup>a</sup>  |                | 0.0225 <sup>b</sup> | 0.9294 <sup>a</sup>   |
| Hodgkin<br>Lymphoma            | <1970            | 8,690        | 156/19.2   | 8.1<br>(6.9-9.5)     | 157.4<br>(129.2-185.6) | 87/0.0                 | 100.1<br>(79.1-121.1)  | 33/6.5                       | 5.1<br>(3.5-7.2)     | 30.5<br>(17.6-43.5)  | 36/12.8        | 2.8<br>(2.0-3.9)    | 26.7<br>(13.2-40.3)   |
|                                | 1970-1979        | 13,011       | 105/14.8   | 7.1<br>(5.8-8.6)     | 69.3<br>(53.9-84.8)    | 40/0.0                 | 30.7<br>(21.2-40.3)    | 32/3.2                       | 10.1<br>(6.9-14.3)   | 22.2<br>(13.6-30.7)  | 33/11.6        | 2.8<br>(2.0-4.0)    | 16.4<br>(7.8-25.1)    |
|                                | 1980-1989        | 11,424       | 42/9.1     | 4.6<br>(3.3-6.2)     | 28.8<br>(17.7-39.9)    | 19/0.0                 | 16.6<br>(9.2-24.1)     | 10/1.4                       | 7.1<br>(3.4-13.1)    | 7.5<br>(2.1-12.9)    | 13/7.7         | 1.7<br>(0.9-2.9)    | 4.6<br>(-1.6-10.8)    |
|                                | 1990-2006        | 9,475        | 28/4.2     | 6.6<br>(4.4-9.6)     | 25.1<br>(14.1-36.0)    | 14/0.0                 | 14.8<br>(7.0-22.5)     | 5/0.5                        | 9.8<br>(3.2-22.8)    | 4.7<br>(0.1-9.4)     | 9/3.7          | 5.6<br>(1.1-4.6)    | 5.6<br>(-0.6-11.8)    |
| P for trend                    |                  |              |            | <0.0001 <sup>b</sup> | <0.0001 <sup>a</sup>   |                        | <0.0001 <sup>a</sup>   |                              | 0.7078 <sup>b</sup>  | 0.0002 <sup>a</sup>  |                | 0.1414 <sup>b</sup> | 0.0026 <sup>a</sup>   |
| Non-Hodgkin<br>Lymphoma        | <1970            | 7,071        | 46/15.7    | 2.9<br>(2.1-3.9)     | 42.8<br>(24.0-61.6)    | 12/0.0                 | 17.0<br>(7.4-26.6)     | 12/5.6                       | 2.2<br>(1.1-3.8)     | 9.1<br>(-0.5-18.7)   | 22/10.2        | 2.2<br>(1.4-3.3)    | 16.7<br>(3.7-29.7)    |
|                                | 1970-1979        | 6,264        | 27/6.5     | 4<br>(2.7-6.1)       | 32.8<br>(16.5-49.0)    | 11/0.0                 | 17.6<br>(7.2-27.9)     | 9/1.3                        | 6.8<br>(3.1-12.8)    | 12.2<br>(2.9-21.6)   | 7/5.2          | 1.4<br>(0.5-2.8)    | 2.9<br>(-5.3-11.2)    |
|                                | 1980-1989        | 9,047        | 31/6.3     | 4.9<br>(3.3-6.9)     | 27.3<br>(15.2-39.3)    | 11/0.0                 | 12.2<br>(5.0-19.3)     | 5/0.9                        | 5.7<br>(1.8-13.3)    | 4.6<br>(-0.3-9.4)    | 15/5.5         | 2.7<br>(1.5-4.5)    | 10.5<br>(2.2-18.9)    |
|                                | 1990-2006        | 7,962        | 27/3.3     | 8.1<br>(5.3-11.8)    | 29.7<br>(16.9-42.5)    | 14/0.0                 | 17.6<br>(8.4-26.8)     | 5/0.4                        | 12.5<br>(4.1-29.2)   | 5.8<br>(0.3-11.3)    | 8/2.9          | 2.7<br>(1.2-5.4)    | 6.4<br>(-0.6-13.3)    |
| P for trend                    |                  |              |            | 0.9035 <sup>b</sup>  | 0.2571 <sup>a</sup>    |                        | 0.8643 <sup>a</sup>    |                              | 0.3087 <sup>b</sup>  | 0.8793 <sup>a</sup>  |                | 0.9388 <sup>b</sup> | 0.3995 <sup>a</sup>   |

**eTable 3:** Standardized mortality ratios and absolute excess risks for all, recurrence or progression, subsequent primary neoplasm, and non-neoplastic causes-of-death, by first primary neoplastic type and treatment period

Abbreviations: CNS – central nervous system, PNET – primitive nervous system tumor, AML – acute myeloid leukemia, O – observed, E – expected, SMR – standardized mortality ratio, AER – absolute excess risk, CI – confidence intervals, NA – not applicable, NP – not possible to reliably calculate due to very small numbers  
<sup>a</sup>P for trend determined from univariable Poisson model  
<sup>b</sup>P for trend determined from multivariable Poisson model adjusting for sex, first primary neoplasm type, age at diagnosis, treatment period, and attained age

|                              |                  |              | All Causes |                     |                       | Recurrence/Progression |                       | Subsequent Primary Neoplasms |                      |                      | Non-Neoplastic |                     |                     |
|------------------------------|------------------|--------------|------------|---------------------|-----------------------|------------------------|-----------------------|------------------------------|----------------------|----------------------|----------------|---------------------|---------------------|
|                              | Treatment Period | Person-Years | O/E        | SMR (95% CI)        | AER (95% CI)          | O/E                    | AER (95% CI)          | O/E                          | SMR (95% CI)         | AER (95% CI)         | O/E            | SMR (95% CI)        | AER (95% CI)        |
| Neuroblastoma                | <1970            | 8,798        | 49/10.1    | 4.8<br>(3.6-6.4)    | 44.2<br>(28.6-59.8)   | 18/0.0                 | 20.5<br>(11.0-29.9)   | 11/3.1                       | 3.6<br>(1.8-6.4)     | 9.0<br>(1.6-16.4)    | 20/7.1         | 2.8<br>(1.7-4.4)    | 14.7<br>(4.7-24.7)  |
|                              | 1970-1979        | 4,584        | 23/2.7     | 8.4<br>(5.3-12.6)   | 44.2<br>(23.7-64.7)   | 13/0.0                 | 28.4<br>(12.9-43.8)   | 5/0.5                        | 10.7<br>(3.5-24.9)   | 9.9<br>(0.3-19.4)    | 5/2.3          | 2.2<br>(0.7-5.2)    | 6.0<br>(-3.6-15.5)  |
|                              | 1980-1989        | 6,739        | 29/2.5     | 11.6<br>(7.8-16.7)  | 39.3<br>(23.7-55.0)   | 17/0.0                 | 25.2<br>(13.2-37.2)   | 4/0.4                        | 11.2<br>(3.1-28.7)   | 5.4<br>(-0.4-11.2)   | 8/2.1          | 3.7<br>(1.6-7.4)    | 8.7<br>(0.5-16.9)   |
|                              | 1990-2006        | 8,380        | 43/1.5     | 28.9<br>(20.9-38.9) | 49.5<br>(34.2-64.9)   | 37/0.0                 | 44.2<br>(29.9-58.4)   | 2/0.3                        | 7.7<br>(0.9-27.9)    | 2.1<br>(-1.2-5.4)    | 4/1.2          | 3.3<br>(0.9-8.3)    | 3.3<br>(-1.4-8.0)   |
| P for trend                  |                  |              |            | 0.0212 <sup>b</sup> | 0.7274 <sup>a</sup>   |                        | 0.0082 <sup>a</sup>   |                              | 0.6128 <sup>b</sup>  | 0.0842 <sup>a</sup>  |                | 0.9201              | 0.0596 <sup>c</sup> |
| Non-heritable Retinoblastoma | <1970            | 11,822       | 19/17.0    | 1.1<br>(0.7-1.8)    | 1.7<br>(-5.5-9.0)     | 0/0.0                  | 0                     | 13/5.8                       | 2.2<br>(1.2-3.8)     | 6.1<br>(0.1-12.1)    | 6/11.2         | 0.5<br>(0.2-1.2)    | -4.4<br>(-8.4--0.3) |
|                              | 1970-1979        | 6,498        | 9/4.1      | 2.2<br>(1.0-4.2)    | 7.6<br>(-1.5-16.6)    | 0/0.0                  | 0                     | 1/0.7                        | 1.4<br>(0.0-7.7)     | 0.4<br>(-2.6-3.4)    | 8/3.4          | 2.4<br>(1.0-4.7)    | 7.1<br>(-1.4-15.7)  |
|                              | 1980-1989        | 3,720        | 2/1.4      | 1.4<br>(0.2-5.2)    | 1.6<br>(-5.8-9.1)     | 0/0.0                  | 0                     | 1/0.2                        | 5.1<br>(0.1-28.3)    | 2.2<br>(-3.1-7.4)    | 1/1.2          | 0.8<br>(0.0-4.7)    | -0.5<br>(-5.8-4.8)  |
|                              | 1990-2006        | 4,127        | 1/0.8      | 1.3<br>(0.0-7.3)    | 0.6<br>(-4.2-5.3)     | 0/0.0                  | 0                     | 0/0.1                        | 0                    | -0.3<br>(-0.3--0.3)  | 1/0.6          | 1.6<br>(0.0-8.8)    | 0.9<br>(-3.9-5.6)   |
| P for trend                  |                  |              |            | 0.5205 <sup>b</sup> | 0.9396 <sup>a</sup>   |                        | NA                    |                              | 0.6345 <sup>b</sup>  | 0.1790 <sup>a</sup>  |                | 0.2701 <sup>b</sup> | 0.5799 <sup>a</sup> |
| Heritable Retinoblastoma     | <1970            | 10,939       | 96/13.2    | 7.3<br>(5.9-8.9)    | 75.7<br>(58.1-93.2)   | 11/0.0                 | 10.1<br>(4.1-16.0)    | 71/4.1                       | 17.2<br>(13.4-21.7)  | 61.1<br>(46.0-76.2)  | 14/9.1         | 1.5<br>(0.8-2.6)    | 4.5<br>(-2.2-11.2)  |
|                              | 1970-1979        | 3,996        | 21/2.3     | 9.2<br>(5.7-14.1)   | 46.8<br>(24.4-69.3)   | 3/0.0                  | 7.5<br>(-1.0-16.0)    | 15/0.4                       | 39.1<br>(21.9-64.4)  | 36.6<br>(17.6-55.6)  | 3/1.9          | 1.6<br>(0.3-4.6)    | 2.8<br>(-5.7-11.3)  |
|                              | 1980-1989        | 2,835        | 17/1.0     | 17.0<br>(9.9-27.3)  | 56.4<br>(27.9-84.9)   | 5/0.0                  | 17.6<br>(2.2-33.1)    | 11/0.1                       | 77.6<br>(38.7-138.9) | 38.3<br>(15.4-61.2)  | 1/0.9          | 1.2<br>(0.0-6.5)    | 0.5<br>(-6.4-7.4)   |
|                              | 1990-2006        | 2,392        | 4/0.4      | 9.9<br>(2.7-25.4)   | 15.0<br>(-1.4-31.4)   | 2/0.0                  | 8.4<br>(-3.2-20.0)    | 2/0.1                        | 27.4<br>(3.3-99.0)   | 8.1<br>(-3.5-19.6)   | 0/0.3          | 0                   | -1.4<br>(-1.4--1.4) |
| P for trend                  |                  |              |            | 0.6438 <sup>b</sup> | 0.0014 <sup>a</sup>   |                        | 0.7669 <sup>a</sup>   |                              | 0.7772 <sup>b</sup>  | 0.0004 <sup>a</sup>  |                | 0.6380 <sup>b</sup> | 0.2283 <sup>a</sup> |
| Wilms                        | <1970            | 13,514       | 75/16.6    | 4.5<br>(3.6-5.7)    | 43.2<br>(30.7-55.8)   | 11/0.0                 | 8.1<br>(3.3-12.9)     | 29/5.2                       | 5.6<br>(3.7-8.0)     | 17.6<br>(9.8-25.4)   | 35/11.4        | 3.1<br>(2.1-4.3)    | 17.5<br>(8.9-26.1)  |
|                              | 1970-1979        | 15,121       | 65/10.0    | 6.5<br>(5.0-8.3)    | 36.3<br>(25.9-46.8)   | 19/0.0                 | 12.6<br>(6.9-18.2)    | 17/1.8                       | 9.4<br>(5.4-15.0)    | 10.0<br>(4.7-15.4)   | 29/8.2         | 3.5<br>(2.4-5.1)    | 13.7<br>(6.8-20.7)  |
|                              | 1980-1989        | 11,964       | 29/4.9     | 5.9<br>(3.9-8.4)    | 20.1<br>(11.3-28.9)   | 10/0.0                 | 8.4<br>(3.2-13.5)     | 3/0.7                        | 4.2<br>(0.9-12.3)    | 1.9<br>(-0.9-4.7)    | 16/4.2         | 3.8<br>(2.2-6.2)    | 9.8<br>(3.3-16.4)   |
|                              | 1990-2006        | 10,920       | 15/2.3     | 6.6<br>(3.7-10.8)   | 11.6<br>(4.7-18.6)    | 12/0.0                 | 11.0<br>(4.8-17.2)    | 0/0.4                        | 0                    | -0.3<br>(-0.3--0.3)  | 3/1.9          | 1.6<br>(0.3-4.6)    | -2.1<br>(-2.1-4.1)  |
| P for trend                  |                  |              |            | 0.8409 <sup>b</sup> | <0.0001 <sup>a</sup>  |                        | 0.7485 <sup>a</sup>   |                              | 0.1683 <sup>b</sup>  | <0.0001 <sup>a</sup> |                | 0.2889 <sup>b</sup> | 0.0117 <sup>a</sup> |
| Bone Sarcoma                 | <1970            | 5,634        | 48/13.2    | 3.6<br>(2.7-4.8)    | 61.9<br>(37.8-86.0)   | 25/0.0                 | 44.4<br>(27.0-61.8)   | 13/5.2                       | 2.5<br>(1.3-4.3)     | 13.9<br>(1.4-26.5)   | 10/8.0         | 1.3<br>(0.6-2.3)    | 3.6<br>(-7.4-14.6)  |
|                              | 1970-1979        | 5,004        | 41/5.3     | 7.8<br>(5.6-10.5)   | 71.4<br>(46.3-96.4)   | 23/0.0                 | 46.0<br>(27.2-64.7)   | 10/1.3                       | 7.6<br>(3.6-13.9)    | 17.3<br>(5.0-29.7)   | 8/4.0          | 2.0<br>(0.9-4.0)    | 8.1<br>(-3.0-19.1)  |
|                              | 1980-1989        | 5,635        | 44/3.9     | 11.3<br>(8.2-15.1)  | 71.2<br>(48.1-94.2)   | 29/0.0                 | 51.5<br>(32.7-70.2)   | 11/0.7                       | 16.6<br>(8.3-29.7)   | 18.3<br>(6.8-29.9)   | 4/3.2          | 1.2<br>(0.3-3.2)    | 1.4<br>(-5.6-8.3)   |
|                              | 1990-2006        | 5,524        | 65/2.3     | 28.5<br>(22.0-36.3) | 113.5<br>(84.9-142.1) | 58/0.0                 | 105.0<br>(78.0-132.0) | 3/0.3                        | 10.2<br>(2.1-29.9)   | 4.9<br>(-1.2-11.0)   | 4/2.0          | 2.0<br>(0.5-5.2)    | 3.6<br>(-3.5-10.7)  |
| P for trend                  |                  |              |            | 0.0728 <sup>b</sup> | 0.0110 <sup>a</sup>   |                        | 0.0001 <sup>a</sup>   |                              | 0.5865 <sup>b</sup>  | 0.2928 <sup>a</sup>  |                | 0.8644 <sup>b</sup> | 0.6998 <sup>a</sup> |
| Soft Tissue Sarcoma          | <1970            | 12,458       | 60/22.9    | 2.6<br>(2.0-3.4)    | 29.8<br>(17.6-42.0)   | 26/0.0                 | 20.9<br>(12.8-28.9)   | 13/8.0                       | 1.6<br>(0.9-2.8)     | 4.0<br>(-1.7-9.7)    | 21/14.8        | 1.4<br>(0.9-2.2)    | 5.0<br>(-2.3-12.2)  |
|                              | 1970-1979        | 8,739        | 66/7.3     | 9.0<br>(7.0-11.4)   | 67.1<br>(48.9-85.3)   | 34/0.0                 | 38.9<br>(25.8-52.0)   | 17/1.5                       | 11.1<br>(6.4-17.7)   | 17.7<br>(8.4-26.9)   | 15/5.8         | 2.6<br>(1.4-4.3)    | 10.5<br>(1.8-19.2)  |
|                              | 1980-1989        | 9,975        | 53/5.6     | 9.5<br>(7.1-12.4)   | 47.5<br>(33.2-61.8)   | 35/0.0                 | 35.1<br>(23.5-46.7)   | 9/0.9                        | 10.5<br>(4.8-20.0)   | 8.2<br>(2.3-14.1)    | 9/4.7          | 1.9<br>(0.9-3.6)    | 4.3<br>(-1.6-10.2)  |
|                              | 1990-2006        | 10,891       | 74/3.4     | 21.6<br>(16.9-27.1) | 64.8<br>(49.3-80.3)   | 54/0.0                 | 49.6<br>(36.4-62.8)   | 11/0.5                       | 23.5<br>(11.7-42.0)  | 9.7<br>(3.7-15.6)    | 9/3.0          | 3.0<br>(1.4-5.8)    | 5.5<br>(0.1-10.9)   |
| P for trend                  |                  |              |            | 0.0032 <sup>b</sup> | 0.0140 <sup>a</sup>   |                        | 0.0006 <sup>a</sup>   |                              | 0.0004 <sup>a</sup>  | 0.3869 <sup>a</sup>  |                | 0.6827 <sup>a</sup> | 0.9485 <sup>a</sup> |
| Other                        | <1970            | 13,695       | 68/26.3    | 2.6<br>(2.0-3.3)    | 30.4<br>(18.6-42.2)   | 17/0.0                 | 12.4<br>(6.5-18.3)    | 18/10.1                      | 1.8<br>(1.1-2.8)     | 5.7<br>(-0.3-11.8)   | 33/16.2        | 2.0<br>(1.4-2.9)    | 12.3<br>(4.1-20.5)  |
|                              | 1970-1979        | 12,067       | 51/10.5    | 4.9<br>(3.6-6.4)    | 33.6<br>(22.0-45.2)   | 17/0.0                 | 14.1<br>(7.4-20.8)    | 21/2.9                       | 7.2<br>(4.4-11.0)    | 15.0<br>(7.5-22.4)   | 13/7.5         | 1.7<br>(0.9-3.0)    | 4.5<br>(-1.3-10.4)  |
|                              | 1980-1989        | 13,576       | 51/7.5     | 6.8<br>(5.1-9.0)    | 32.1<br>(21.7-42.4)   | 28/0.0                 | 20.6<br>(13.0-28.3)   | 10/1.4                       | 7.4<br>(3.5-13.6)    | 6.4<br>(1.8-10.9)    | 13/6.1         | 2.1<br>(1.1-3.6)    | 5.1<br>(-0.1-10.3)  |
|                              | 1990-2006        | 16,552       | 35/5.3     | 6.6<br>(4.6-9.2)    | 18.0<br>(11.0-25.0)   | 17/0.0                 | 10.3<br>(5.4-15.2)    | 5/0.7                        | 6.7<br>(2.2-15.6)    | 2.6<br>(-0.1-5.2)    | 13/4.5         | 2.9<br>(1.5-4.9)    | 5.1<br>(0.9-9.4)    |
| P for trend                  |                  |              |            | 0.2234 <sup>b</sup> | 0.0115 <sup>a</sup>   |                        | 0.8740 <sup>a</sup>   |                              | 0.6745 <sup>b</sup>  | 0.0187 <sup>a</sup>  |                | 0.7290 <sup>b</sup> | 0.0947 <sup>a</sup> |

**eTable 3 (continued):** Standardized mortality ratios and absolute excess risks for all, recurrence or progression, subsequent primary neoplasm, and non-neoplastic causes-of-death, by first primary neoplastic type and treatment period

Abbreviations: CNS – central nervous system, PNET – primitive nervous system tumor, AML – acute myeloid leukemia, O – observed, E – expected, SMR – standardized mortality ratio, AER – absolute excess risk, CI – confidence intervals, NA – not applicable, NP – not possible to reliably calculate due to very small numbers

<sup>a</sup>P for trend determined from univariable Poisson model

<sup>b</sup>P for trend determined from multivariable Poisson model adjusting for sex, first primary neoplasm type, age at diagnosis, treatment period, and attained age
